# Supplementary material
Source: PubMed Central journal article supplement (PMC10992553)
Supplement: 262_2022_3291_MOESM4_ESM.pdf [file 262_2022_3291_MOESM4_ESM.pdf]

### PFS, Crude

KEYNOTE-045 eligibility — Yes — No

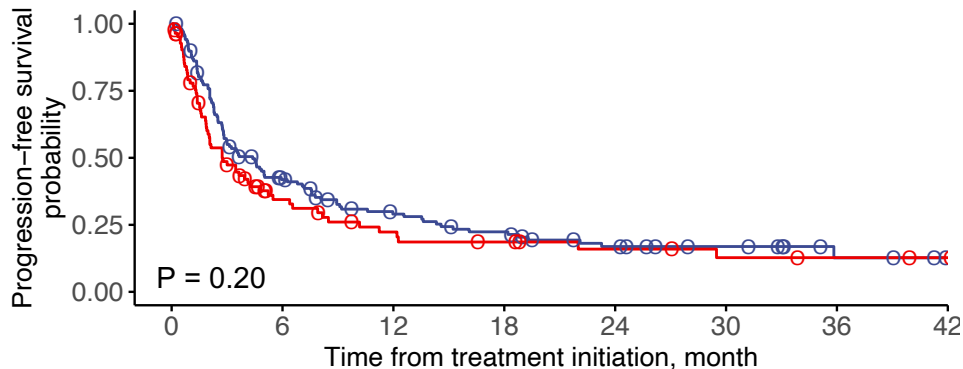

#### Number at risk

|     |    |    |    |    |   |   |   |
|-----|----|----|----|----|---|---|---|
| 138 | 52 | 31 | 23 | 14 | 9 | 3 | 0 |
| 84  | 21 | 12 | 9  | 6  | 4 | 3 | 2 |

### PFS, IPTW-adjusted

KEYNOTE-045 eligibility — Yes — No

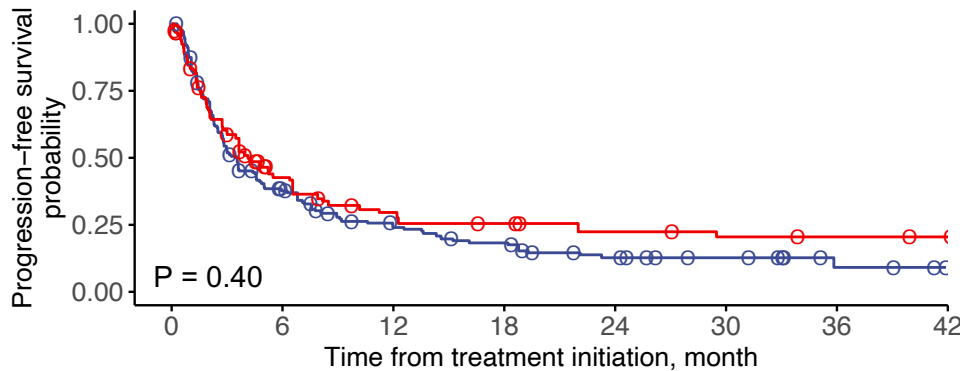

#### Number at risk

|     |    |    |    |    |   |   |   |
|-----|----|----|----|----|---|---|---|
| 138 | 52 | 31 | 23 | 14 | 9 | 3 | 0 |
| 84  | 21 | 12 | 9  | 6  | 4 | 3 | 2 |

### OS, Crude

KEYNOTE-045 eligibility — Yes — No

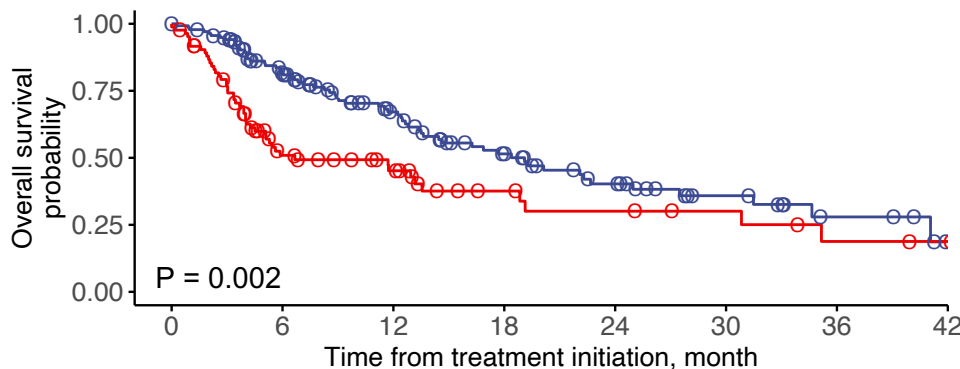

#### Number at risk

|     |    |    |    |    |    |   |   |
|-----|----|----|----|----|----|---|---|
| 138 | 94 | 60 | 37 | 23 | 12 | 5 | 0 |
| 84  | 33 | 22 | 11 | 8  | 6  | 3 | 2 |

### OS, IPTW-adjusted

KEYNOTE-045 eligibility — Yes — No

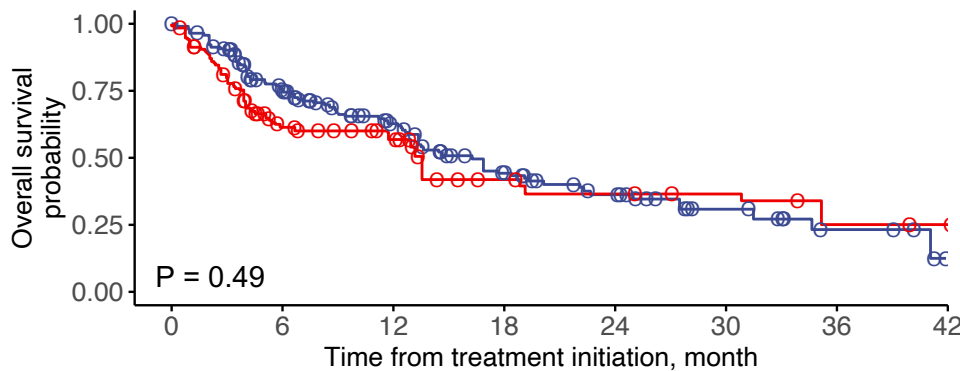

#### Number at risk

|     |    |    |    |    |    |   |   |
|-----|----|----|----|----|----|---|---|
| 138 | 94 | 60 | 37 | 23 | 12 | 5 | 0 |
| 84  | 33 | 22 | 11 | 8  | 6  | 3 | 2 |
