# Supplementary material
Source: PubMed Central journal article supplement (PMC10992553)
Supplement: 262_2022_3291_MOESM6_ESM.pdf [file 262_2022_3291_MOESM6_ESM.pdf]

| <b>Supplemental Table 1. Reason for treatment discontinuation</b> |                 |                   |                |
|-------------------------------------------------------------------|-----------------|-------------------|----------------|
|                                                                   | <b>Eligible</b> | <b>Ineligible</b> | <b>P value</b> |
|                                                                   |                 |                   | 0.81           |
| Comorbidity exacerbation                                          | 1 (1.4)         | 0 (0.0)           |                |
| Disease progression                                               | 56 (78.9)       | 54 (83.1)         |                |
| Unacceptable toxicity                                             | 11 (15.5)       | 10 (15.4)         |                |
| Withdrawal of consent                                             | 3 (4.2)         | 1 (1.5)           |                |
