# Supplementary material
Source: PubMed Central journal article supplement (PMC10992553)
Supplement: 262_2022_3291_MOESM7_ESM.pdf [file 262_2022_3291_MOESM7_ESM.pdf]

**Supplemental Table 2. Treatment-related adverse event**

| <b>Characteristic</b>  | <b>All</b>                | <b>Grade 3 or more</b>    |
|------------------------|---------------------------|---------------------------|
|                        | <b>N = 60<sup>1</sup></b> | <b>N = 15<sup>1</sup></b> |
| Adrenal insufficiency  | 4 (6.7)                   | 2 (13)                    |
| Colitis                | 2 (3.3)                   |                           |
| Elevated liver enzyme  | 5 (8.3)                   | 3 (20)                    |
| Hypopituitarism        | 1 (1.7)                   | 1 (6.7)                   |
| Hypothyroidism         | 13 (22)                   | 2 (13)                    |
| Nephritis              | 2 (3.3)                   |                           |
| Pneumonitis            | 10 (17)                   | 2 (13)                    |
| Polymyalgia rheumatica | 2 (3.3)                   | 1 (6.7)                   |
| Rash                   | 8 (13)                    | 2 (13)                    |
| Thyroiditis            | 5 (8.3)                   | 2 (13)                    |
| Other                  | 8 (13)                    | 0 (0)                     |

<sup>1</sup>n (%)
