# Supplementary material
Source: PubMed Central journal article supplement (PMC10992553)
Supplement: 262_2022_3291_MOESM8_ESM.pdf [file 262_2022_3291_MOESM8_ESM.pdf]

**Supplemental Table 3. Patient characteristics of unweighted and weighted population**

| Characteristic                                      | Overall,<br>N = 222 | Unweighted population <sup>a</sup> |                       |      | Weighted population <sup>b</sup> |             |      |
|-----------------------------------------------------|---------------------|------------------------------------|-----------------------|------|----------------------------------|-------------|------|
|                                                     |                     | Eligible,<br>N = 138               | Ineligible,<br>N = 84 | SMD  | Eligible                         | Ineligible  | SMD  |
| Age at baseline, year (mean [SD])                   | 71.7 (9.4)          | 71.5 (8.9)                         | 72.2 (10.2)           | 0.08 | 71.5 (8.6)                       | 72.7 (10.0) | 0.13 |
| Sex                                                 |                     |                                    |                       | 0.07 |                                  |             | 0.06 |
| Male                                                | 165 (74.3)          | 101 (73.2)                         | 64 (76.2)             |      | 74.7                             | 77.1        |      |
| Female                                              | 57 (25.7)           | 37 (26.8)                          | 20 (23.8)             |      | 25.3                             | 22.9        |      |
| ECOG performance status                             |                     |                                    |                       | 0.38 |                                  |             | 0.05 |
| 0                                                   | 105 (47.3)          | 75 (54.3)                          | 30 (35.7)             |      | 51.4                             | 53.9        |      |
| 1 or more                                           | 117 (52.7)          | 63 (45.7)                          | 54 (64.3)             |      | 48.6                             | 46.1        |      |
| Body mass index, kg/m <sup>2</sup> (mean [SD])      | 21.9 (3.6)          | 22.3 (3.7)                         | 21.2 (3.2)            | 0.34 | 21.8 (3.7)                       | 21.8 (3.2)  | 0.02 |
| Smoking status                                      |                     |                                    |                       | 0.18 |                                  |             | 0.04 |
| Former or current                                   | 126 (56.8)          | 83 (60.1)                          | 43 (51.2)             |      | 56.2                             | 54.2        |      |
| Never                                               | 96 (43.2)           | 55 (39.9)                          | 41 (48.8)             |      | 43.8                             | 45.8        |      |
| Previous radical surgery                            | 138 (62.2)          | 97 (70.3)                          | 41 (48.8)             | 0.45 | 62.5                             | 58.4        | 0.08 |
| Primary location of tumor                           |                     |                                    |                       | 0.22 |                                  |             | 0.06 |
| Lower tract                                         | 118 (53.2)          | 79 (57.2)                          | 39 (46.4)             |      | 52.7                             | 49.8        |      |
| Upper tract                                         | 104 (46.8)          | 59 (42.8)                          | 45 (53.6)             |      | 47.3                             | 50.2        |      |
| Location of metastasis                              |                     |                                    |                       | 0.32 |                                  |             | 0.03 |
| LN and visceral metastasis                          | 87 (39.2)           | 46 (33.3)                          | 41 (48.8)             |      | 40.2                             | 38          |      |
| LN or visceral metastasis                           | 135 (60.8)          | 92 (66.7)                          | 43 (51.2)             |      | 59.8                             | 62          |      |
| Liver metastasis                                    | 43 (19.4)           | 17 (12.3)                          | 26 (31.0)             | 0.46 | 16.9                             | 21.5        | 0.12 |
| Platinum                                            |                     |                                    |                       | 0.48 |                                  |             | 0.03 |
| Other platinum                                      | 70 (31.5)           | 32 (23.2)                          | 38 (45.2)             |      | 35.1                             | 33.8        |      |
| Cisplatin                                           | 152 (68.5)          | 106 (76.8)                         | 46 (54.8)             |      | 64.9                             | 66.2        |      |
| Most recent chemotherapy                            |                     |                                    |                       | 0.4  |                                  |             | 0.06 |
| Perioperative                                       | 54 (24.3)           | 42 (30.4)                          | 12 (14.3)             |      | 22.9                             | 20.5        |      |
| Salvage                                             | 168 (75.7)          | 96 (69.6)                          | 72 (85.7)             |      | 77.1                             | 79.5        |      |
| Concomitant proton pump inhibitor use               | 91 (41.0)           | 45 (32.6)                          | 46 (54.8)             | 0.46 | 38.8                             | 37.5        | 0.03 |
| Previous antibiotic use                             | 39 (17.6)           | 18 (13.0)                          | 21 (25.0)             | 0.31 | 18.9                             | 23.7        | 0.12 |
| Baseline neutrophil-to-lymphocyte ratio (mean [SD]) | 4.5 (3.8)           | 4.0 (3.3)                          | 5.3 (4.4)             | 0.32 | 4.7 (4.5)                        | 4.8 (3.7)   | 0.02 |
| Bajorin risk score                                  |                     |                                    |                       | 0.39 |                                  |             | 0.05 |
| 0                                                   | 103 (46.4)          | 74 (53.6)                          | 29 (34.5)             |      | 46.3                             | 48.9        |      |
| 1 to 2                                              | 119 (53.6)          | 64 (46.4)                          | 55 (65.5)             |      | 53.7                             | 51.1        |      |
| Without progression following chemotherapy          | 58 (26.1)           | 37 (26.8)                          | 21 (25.0)             | 0.04 | 27.3                             | 29.1        | 0.04 |

SMD; standardized mean difference, ECOG; eastern cooperative oncology group, LN; lymph node, SD; standard deviation

a: Data are presented as number (percentage) of patients

b: Data are presented as percentage of patients
