# Supplementary material
Source: PubMed Central journal article supplement (PMC10992553)

Proportion of patients with the best overall response

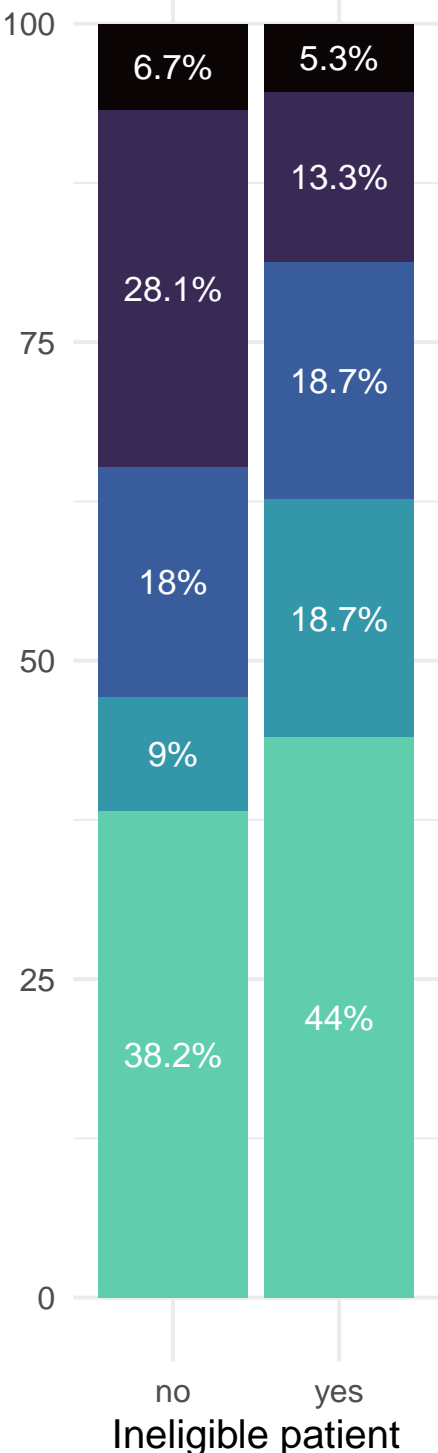

response

- iCR
- iPR
- iSD
- iUPD
- iCPD

Supplement: 262_2022_3291_MOESM3_ESM.pdf [file 262_2022_3291_MOESM3_ESM.pdf]

Progression-free survival

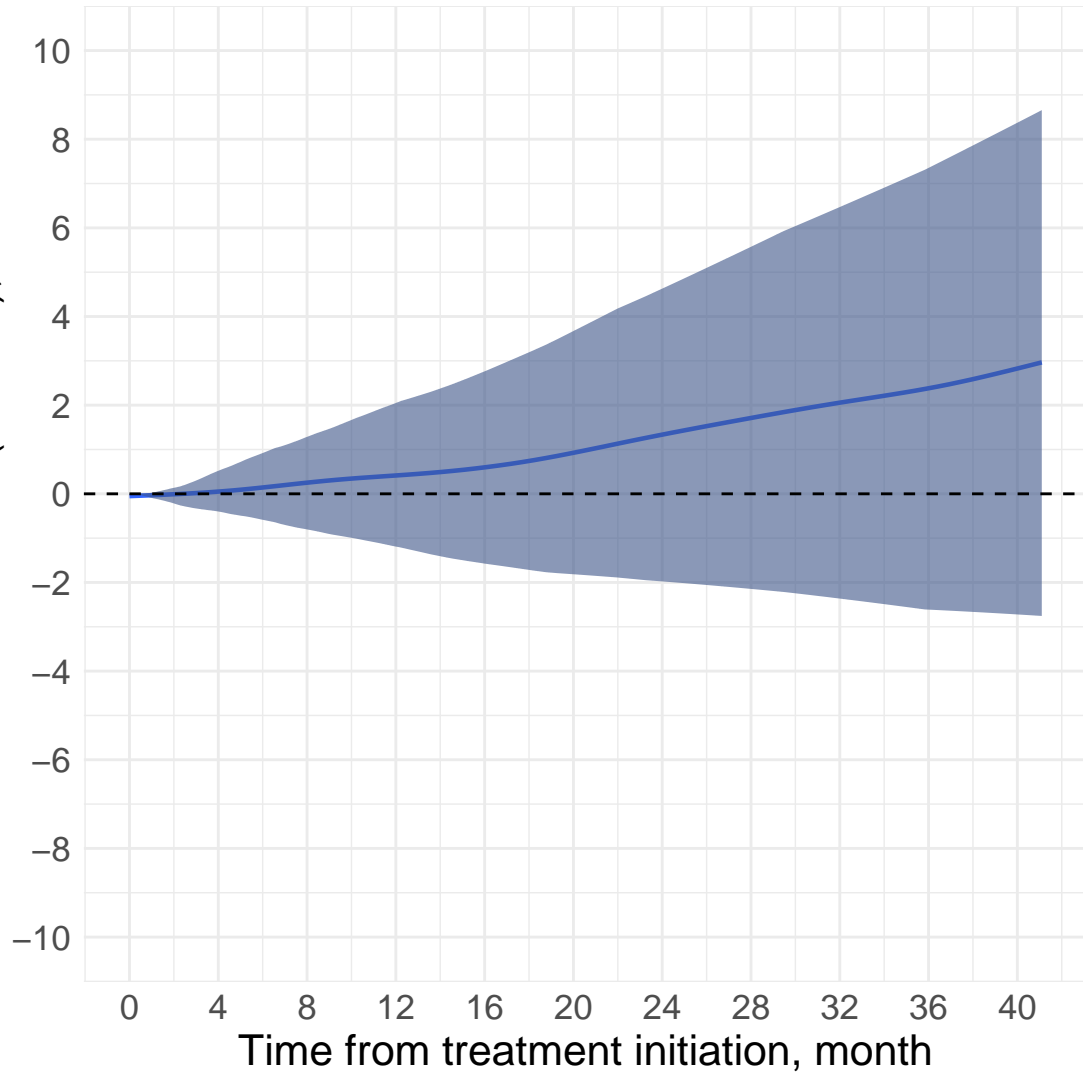

Overall survival

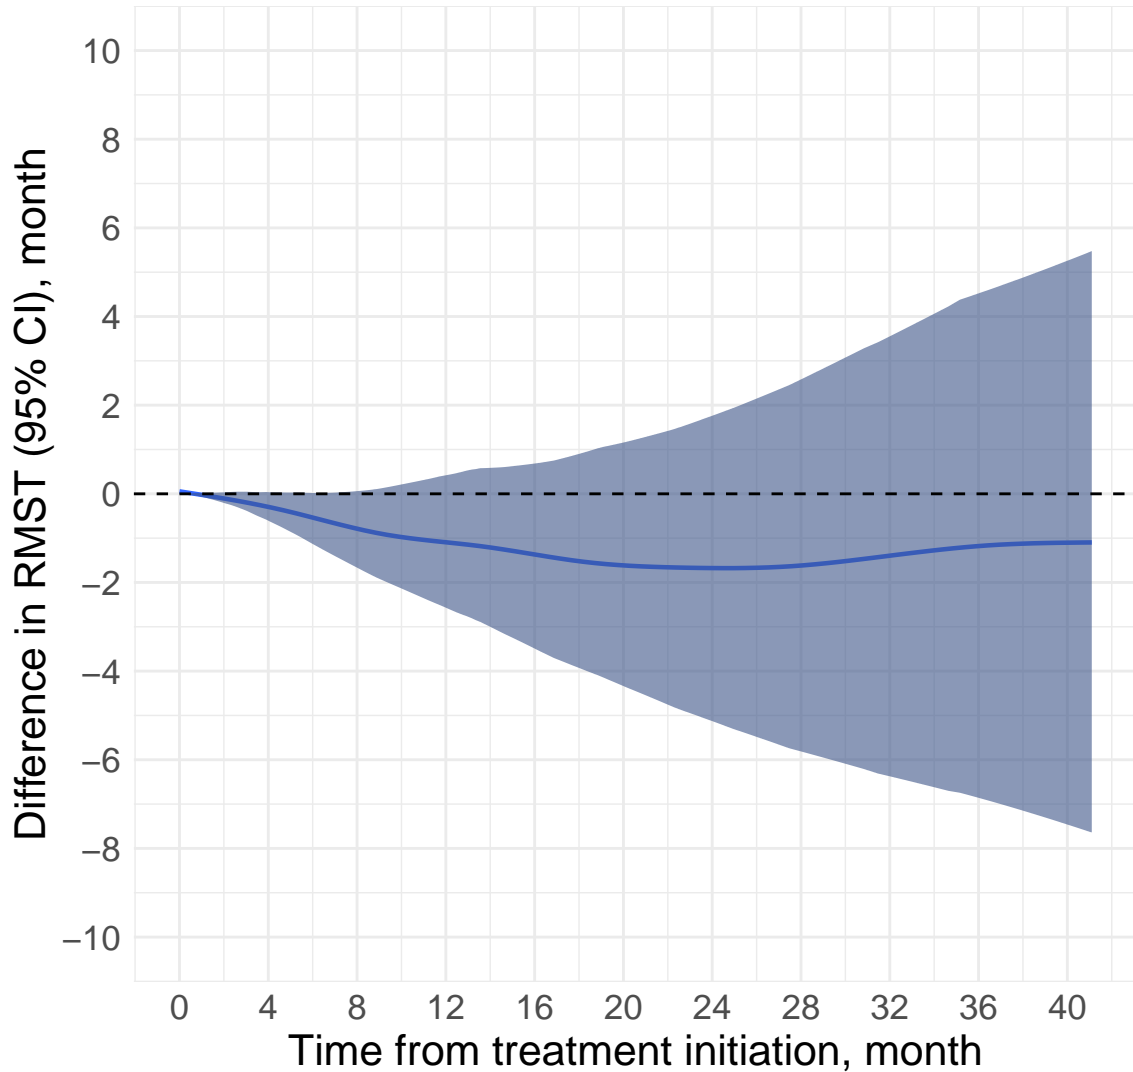

Supplement: 262_2022_3291_MOESM5_ESM.pdf [file 262_2022_3291_MOESM5_ESM.pdf]
